# Supplementary material
Source: PubMed Central journal article supplement (PMC6007098)
Supplement: AEM.00799-18_zam013188602s2.pdf [file AEM.00799-18_zam013188602s2.pdf]

Table S2: Comparison of MIC values between isolates with and without tolerance-mediating gene

| Gene        | Biocide | Isolates with tolerance-mediating gene |                   |        |         |         | Isolates without tolerance-mediating gene |                   |        |         |         | p-value |
|-------------|---------|----------------------------------------|-------------------|--------|---------|---------|-------------------------------------------|-------------------|--------|---------|---------|---------|
|             |         | Number of isolates                     | MIC value (µg/ml) |        |         |         | Number of isolates                        | MIC value (µg/ml) |        |         |         |         |
|             |         |                                        | Mean              | VC     | Minimum | Maximum |                                           | Mean              | VC     | Minimum | Maximum |         |
| <i>ImrS</i> | CHX     | 50                                     | 0.85              | 0.50   | 0.5     | 4       | 14                                        | 0.61              | 0.32   | 0.125   | 2       | 0.55    |
|             | BKC     | 50                                     | 1.56              | 0.61   | < 2     | 64      | 14                                        | 1.10              | 0.76   | <2      | 4       | 0.19    |
|             | ACR     | 50                                     | 8.57              | 4.36   | < 2     | 32      | 14                                        | 10.77             | 7.54   | 8       | 16      | 0.23    |
|             | BEN     | 50                                     | 1.36              | 0.53   | < 1     | 4       | 14                                        | 0.74              | 0.39   | <1      | 2       | 0.03    |
|             | ADH     | 50                                     | 0.04              | 0.02   | <0.0625 | 0.25    | 14                                        | 0.04              | 0.02   | <0.0625 | 0.125   | 0.6     |
| <i>norA</i> | CHX     | 45                                     | 0.77              | 0.45   | 0.125   | 2       | 19                                        | 0.83              | 0.44   | 0.5     | 4       | 0.61    |
|             | BKC     | 45                                     | 1.45              | 0.61   | < 2     | 64      | 19                                        | 1.44              | 0.60   | <2      | 16      | 0.98    |
|             | ACR     | 45                                     | 10.08             | 5.58   | < 2     | 32      | 19                                        | 6.91              | 3.66   | 4       | 16      | 0.03    |
|             | BEN     | 45                                     | 1.28              | 0.53   | < 1     | 4       | 19                                        | 1.00              | 0.39   | <1      | 4       | 0.32    |
|             | ADH     | 45                                     | 0.04              | 0.02   | <0.0625 | 0.25    | 19                                        | 1371.04           | 733.91 | 1024    | 8192    | 0.94    |
| <i>sepA</i> | CHX     | 35                                     | 0.73              | 0.42   | 0.125   | 2       | 29                                        | 0.87              | 0.48   | 0.5     | 4       | 0.23    |
|             | BKC     | 35                                     | 1.24              | 0.60   | < 2     | 16      | 29                                        | 1.73              | 0.66   | <2      | 64      | 0.12    |
|             | ACR     | 35                                     | 9.56              | 4.95   | 4       | 32      | 29                                        | 8.39              | 4.68   | <2      | 16      | 0.41    |
|             | BEN     | 35                                     | 1.06              | 0.47   | < 1     | 4       | 29                                        | 1.36              | 0.50   | <1      | 4       | 0.27    |
|             | ADH     | 35                                     | 0.04              | 0.02   | <0.0625 | 0.25    | 29                                        | 0.04              | 0.02   | <0.0625 | 0.25    | 0.28    |
| <i>copA</i> | COP     | 9                                      | 1194.53           | 752.50 | 1024    | 4096    | 12                                        | 1722.16           | 590.26 | 512     | 8192    | 0.35    |
| <i>mco</i>  | COP     | 12                                     | 1824.56           | 757.99 | 512     | 8192    | 9                                         | 1105.98           | 492.66 | 512     | 4096    | 0.20    |
| <i>czrC</i> | ZKC     | 13                                     | 316.86            | 32.72  | 64      | >8192   | 5                                         | 84.45             | 45.43  | 32      | 128     | 0.22    |
